# Supplementary material for: Noble metal-free bis-tridentate benzimidazole zinc(ii) and iron(ii) complexes for selective CO2photoreduction
Source: Royal Society of Chemistry journal article supplement (doi:10.1039/d2dt00226d), 2022-01-01
Supplement: d2dt00226d1.pdf [file d2dt00226d1.pdf]

## Supporting Information

Noble metal-free bis-tridentate benzimidazole zinc(II) and iron(II)  
complexes for selective CO<sub>2</sub> photoreduction

Ting Liu, Longxin Chen, and Duobin Chao\*

School of Materials Science and Chemical Engineering, Ningbo University,  
Ningbo, Zhejiang 315211, China.

# 1. Experimental Section

## 1.1 Materials and instruments

All chemical reagents were purchased through commercial channels and used as received. Ligand 2,6-bis(1-methyl-1H-benzo[d]imidazol-2-yl)pyridine (abbreviated as Me-bzimpy), 2,6-bis(1H-benzo[d]imidazol-2-yl)pyridine (abbreviated as bzimpy) and photosensitizer 4CzIPN were synthesized according to existing methods.<sup>1,2</sup> The fourier transform infrared spectrum (FT-IR) spectra were obtained on a Nicolet 670 FT-IR spectrometer. The UV-vis absorption spectra were measured on a G9 spectrophotometer. The CV and SWV tests were performed at room temperature with the electrochemical workstation CHI 660E. The working electrode, reference electrode and counter electrode were respectively glassy carbon electrode, Ag/AgCl electrode and platinum foil. The potential of the Ag/AgCl reference electrode was calibrated by the internal standard oxidation of ferrocene. The gas-phase products of the photocatalytic system were analyzed by Shimadzu GC-2014 (2 m x 3 mm packed column TDX-01, a hydrogen flame ionization detector, and N<sub>2</sub> as carrier gas).

## 1.2 Synthesis and Characterization of Complexes

**Me-bzimpy:** Yield: 60%. <sup>1</sup>H NMR (400 MHz, Chloroform-*d*),  $\delta$  (ppm): 8.43 (d, *J* = 7.9 Hz, 2H), 8.06 (t, *J* = 7.9 Hz, 1H), 7.88 (dd, *J* = 6.8, 1.7 Hz, 2H), 7.48 (dd, *J* = 6.9, 1.7 Hz, 2H), 7.42-7.32 (m, 4H), 4.25 (s, 6H). <sup>1</sup>H NMR results of Me-bzimpy are consistent with previous report.<sup>1</sup>

**Bzimpy:** Yield: 85%. <sup>1</sup>H NMR (400 MHz, Chloroform-*d*),  $\delta$  (ppm): 8.51 (d, *J* = 8.1 Hz, 2H), 8.09-8.00 (m, 1H), 7.37 (dd, *J* = 5.8, 3.1 Hz, 2H), 7.28 (s, 6H). <sup>1</sup>H NMR results of bzimpy are consistent with previous report.<sup>1</sup>

**Fe1:** Under a N<sub>2</sub> atmosphere, dissolved ligands Me-bzimpy (200 mg, 0.59 mmol) in 30 mL CH<sub>3</sub>OH/CH<sub>2</sub>Cl<sub>2</sub> (v/v=2/1), and then slowly added FeCl<sub>2</sub>·4H<sub>2</sub>O (60 mg, 0.3 mmol) in methanol solution. The reaction mixture was stirred at 75°C for 12h. After cooling to room temperature, used a rotary evaporator evaporate and removed CH<sub>2</sub>Cl<sub>2</sub> under reduced pressure, then NH<sub>4</sub>PF<sub>6</sub> was added to precipitate a solid. The precipitate obtained by filtration was thoroughly washed with water, EtOH and CH<sub>2</sub>Cl<sub>2</sub>. **Fe1** was obtained (202 mg, yield: 78%). <sup>1</sup>H NMR (400 MHz, DMSO-*d*<sub>6</sub>),  $\delta$  (ppm): 9.16 (s, 1H), 8.97 (d, *J* = 7.8 Hz, 1H), 8.89-8.79 (m, 1H), 8.47 (d, *J* = 8.1 Hz, 1H), 8.36 (t, *J* = 7.4 Hz, 1H), 7.94-7.81 (m, 1H), 7.62 (d, *J* = 8.3 Hz, 1H), 7.25 (d, *J* = 7.4 Hz, 1H), 7.11 (t, *J* = 7.4 Hz, 1H), 7.02 (t, *J* = 7.3 Hz, 1H), 6.59 (d, *J* = 8.1 Hz, 1H), 3.32 (s, 6H). <sup>1</sup>H NMR results of **Fe1** are consistent with previous report.<sup>1</sup> Elemental analysis: found C 49.07, H 3.69, N 13.85 (calcd. C 49.24, H 3.34, N 13.67).

**Fe2:** The synthesis of **Fe2** was similar to **Fe1**, and finally, a powder (143 mg, yield:

63%) was obtained.  $^1\text{H}$  NMR (400 MHz,  $\text{DMSO-}d_6$ ),  $\delta$  (ppm): 8.41 (d,  $J = 7.8$  Hz, 2H), 8.31-8.23 (m, 1H), 7.82 (dd,  $J = 6.0, 3.2$  Hz, 4H), 7.40 (dd,  $J = 6.1, 3.1$  Hz, 4H).  $^1\text{H}$  NMR results of **Fe2** are consistent with previous report.<sup>1</sup> Elemental analysis: found C 46.97, H 3.07, N 14.63 (calcd. C 47.13, H 2.71, N 14.46).

**Zn1**: Under a  $\text{N}_2$  atmosphere, dissolved the ligand Me-bzimpy (200 mg, 0.59 mmol) in 30 mL  $\text{CH}_3\text{OH}/\text{CH}_2\text{Cl}_2$  ( $v/v=2/1$ ), and then slowly added the methanol solution dissolved  $\text{ZnCl}_2$  (41 mg, 0.3 mmol). The reaction mixture was stirred at  $75^\circ\text{C}$  for 12h. After cooling to room temperature, used a rotary evaporator evaporate and removed  $\text{CH}_2\text{Cl}_2$  under reduced pressure, then  $\text{NH}_4\text{PF}_6$  was added to precipitate a solid. The precipitate obtained by filtration was thoroughly washed with water, EtOH and  $\text{CH}_2\text{Cl}_2$ . **Zn1** was obtained (200 mg, yield: 83%).  $^1\text{H}$  NMR (400 MHz,  $\text{DMSO-}d_6$ ),  $\delta$  (ppm): 8.43 (d,  $J = 7.9$  Hz, 2H), 8.06 (t,  $J = 7.9$  Hz, 1H), 7.88 (dd,  $J = 6.8, 1.7$  Hz, 2H), 7.48 (dd,  $J = 6.9, 1.7$  Hz, 2H), 7.42-7.32 (m, 4H), 4.25 (s, 6H). HR-ESI-MS ( $m/z$ ): found 371.1111 for  $[\text{Zn}(\text{Me-bzimpy})_2]^{2+}$  (calcd. 371.1124  $\text{C}_{42}\text{H}_{34}\text{N}_{10}\text{Zn}^{2+}$ ); found 340.1547 for  $[\text{M-H}]^+$  (calcd 340.1562  $\text{C}_{21}\text{H}_{17}\text{N}_5^+$ ,  $\text{M} = \text{Me-bzimpy}$ ); found 362.1368 for  $[\text{M-Na}]^+$  (calcd 362.1382  $\text{C}_{21}\text{H}_{17}\text{N}_5\text{Na}^+$ ,  $\text{M} = \text{Me-bzimpy}$ ). Elemental analysis: found C 48.63, H 3.65, N 13.71 (calcd. C 48.78, H 3.31, N 13.54).

### 1.3 Photocatalytic $\text{CO}_2$ reduction

**General procedure:** Add 5 mL DMF or DMF/ $\text{H}_2\text{O}$  solution containing **Fe1/Fe2**, 4CzIPN and TEA into a glass tube sealed with a rubber stopper, at room temperature, degassed the solution with  $\text{CO}_2/\text{N}_2$  for 15 minutes. After the solution was fully degassed, it was irradiated with the white LED lighting equipment (SMPC-LVWT, 420-650 nm, 3 W LEDs) provided by the Institute of Physical Chemistry & Chinese Academy of Sciences. The gaseous products ( $\text{CO}$  and  $\text{H}_2$ ) generated by the system were sucked from the headspace of the glass tube with a gas-tight syringe in 200  $\mu\text{L}$  aliquots and injected into the GC-2014 instrument equipped with TCD and FID detectors for analysis. The standard curve was obtained by injecting pure  $\text{H}_2$  and  $\text{CO}$ .

## 2. Supplementary Figures

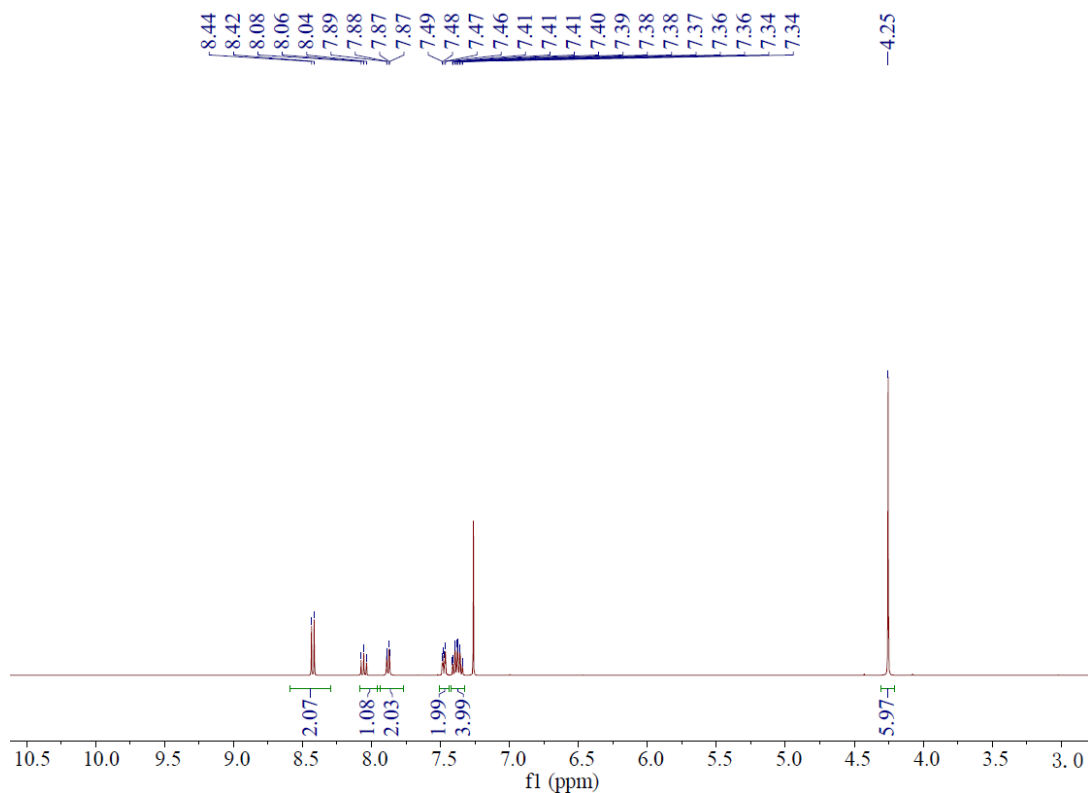

Fig. S1  $^1\text{H}$  NMR spectrum of Me-bzimpy in Chloroform-*d*.

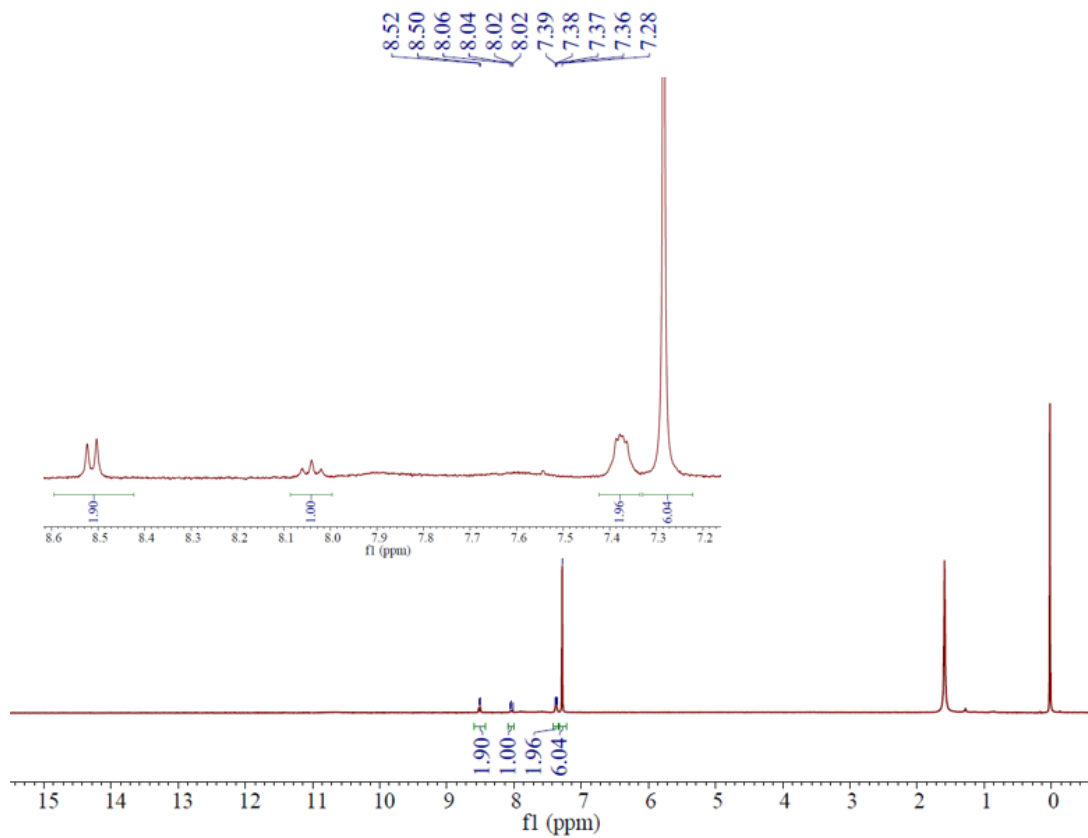

Fig. S2  $^1\text{H}$  NMR spectrum of bzimpy in Chloroform-*d*.

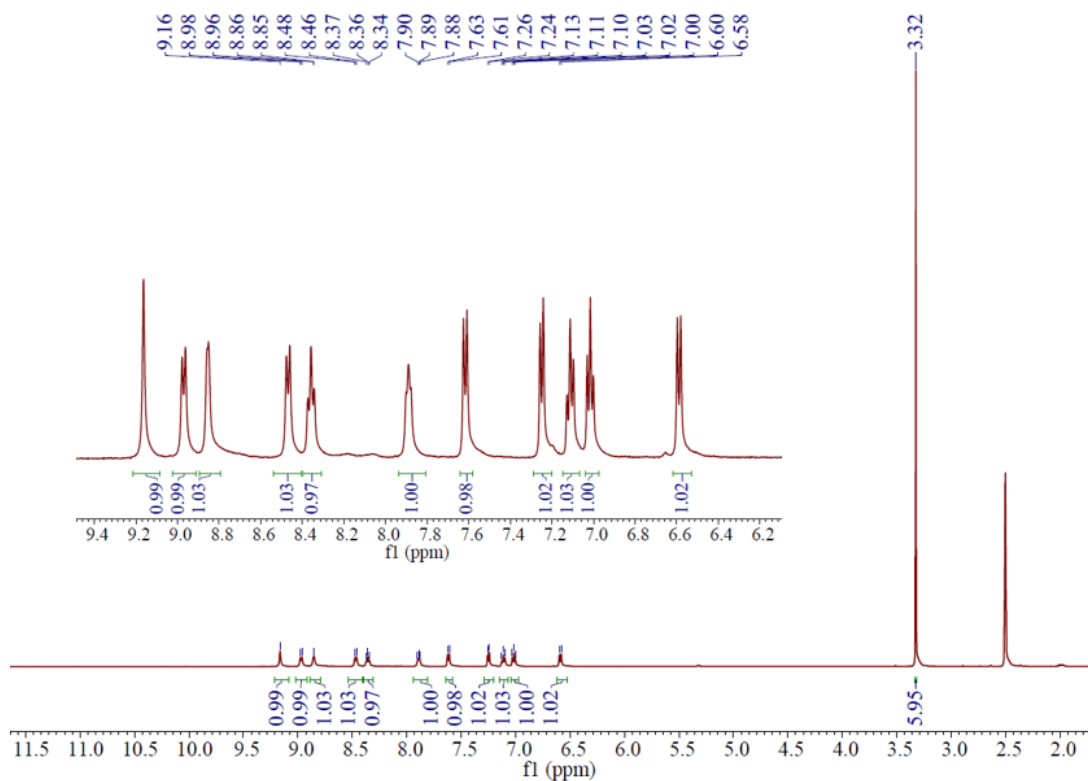

Fig. S3  $^1\text{H}$  NMR spectrum of Fe1 in DMSO- $d_6$ .

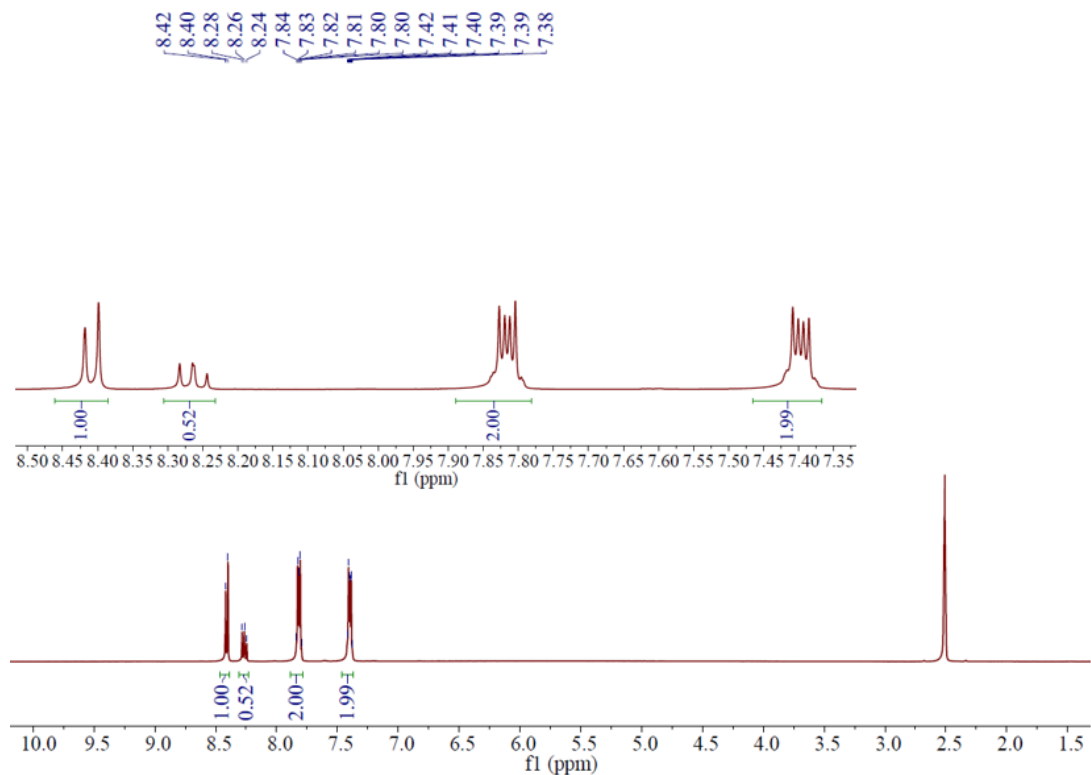

Fig. S4  $^1\text{H}$  NMR spectrum of Fe2 in DMSO- $d_6$ .

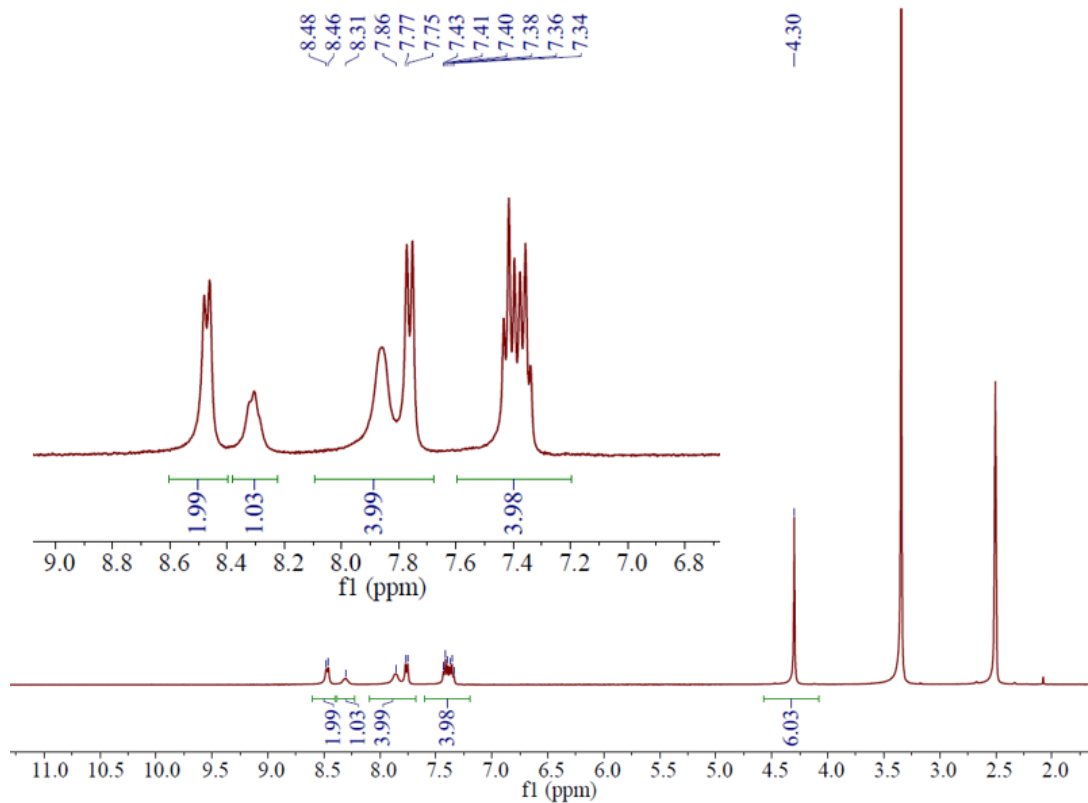

**Fig. S5**  $^1\text{H}$  NMR spectrum of **Zn1** in  $\text{DMSO-}d_6$ .

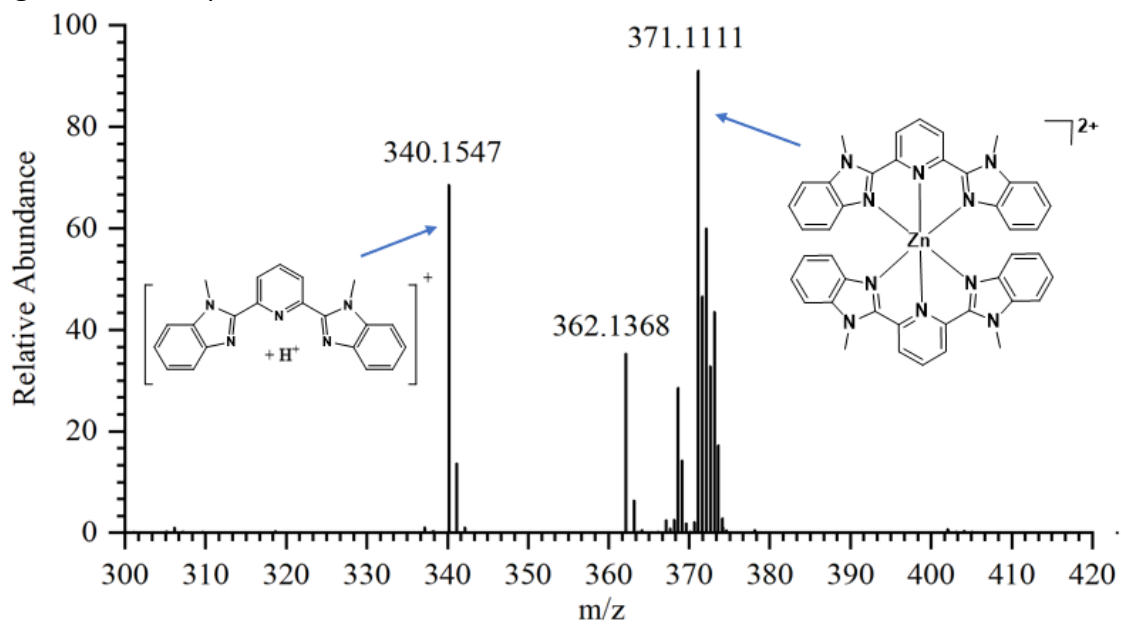

**Fig. S6** HR-ESI-MS spectrum of **Zn1**.

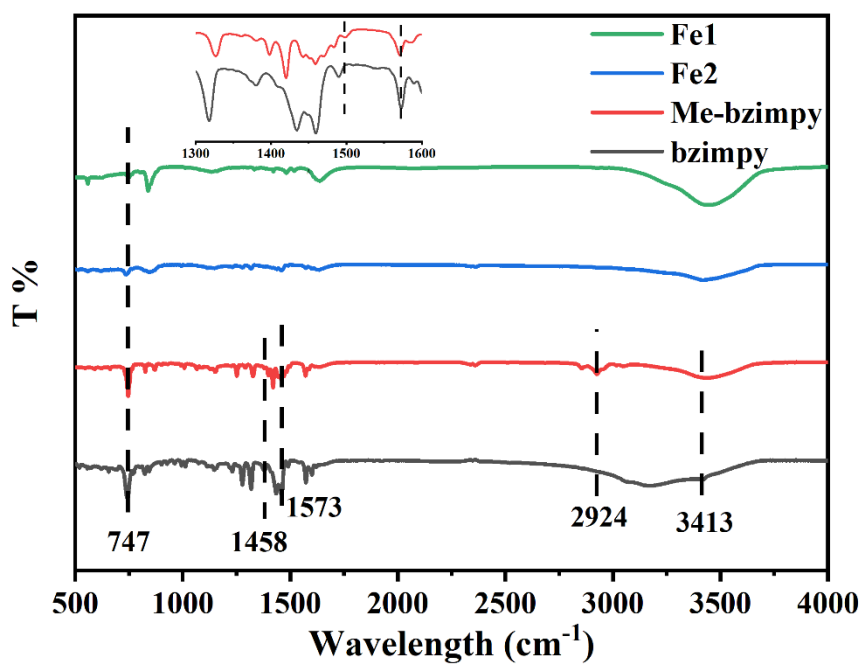

**Fig. S7** FT-IR spectra of **Fe1** (green line), **Fe2** (blue line), Me-bzimpy (red line) and bzimpy (black line).

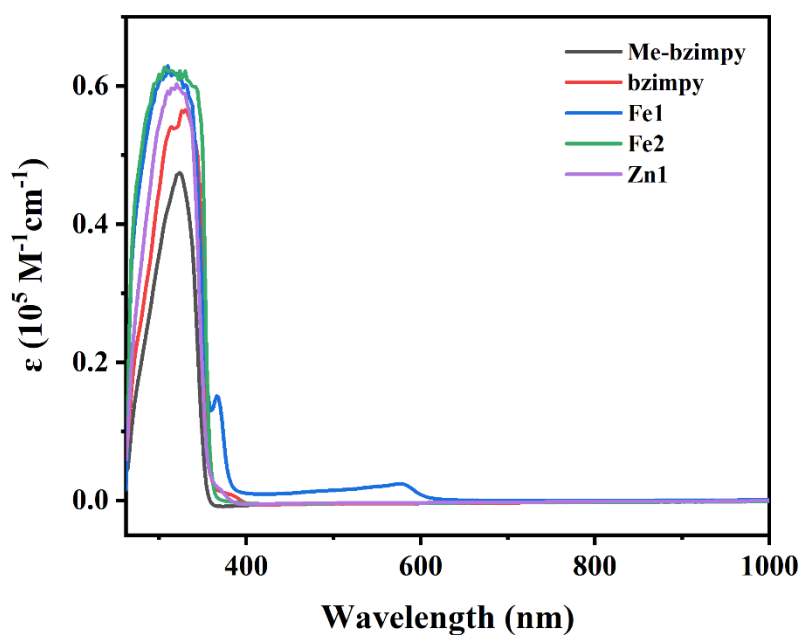

**Fig. S8** UV-vis absorption spectra of 40  $\mu\text{M}$  Me-bzimpy (black line), bzimpy (red line), **Fe1** (blue line), **Fe2** (green line) and **Zn1** (purple line) in DMF solution.

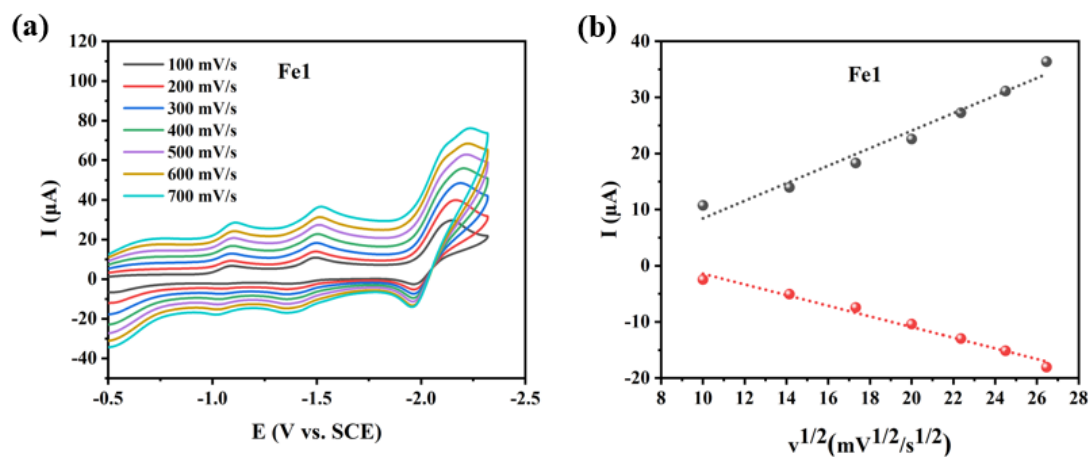

**Fig. S9** (a) CVs of **Fe1** (1 mM) in DMF under a N<sub>2</sub> atmosphere at various scan rates (100-700 mV/s). (b) The square roots of currents (*i*<sub>pc</sub> and *i*<sub>pa</sub>) vs. scan rate (*v*<sup>1/2</sup>) of **Fe1** at -1.43 V.

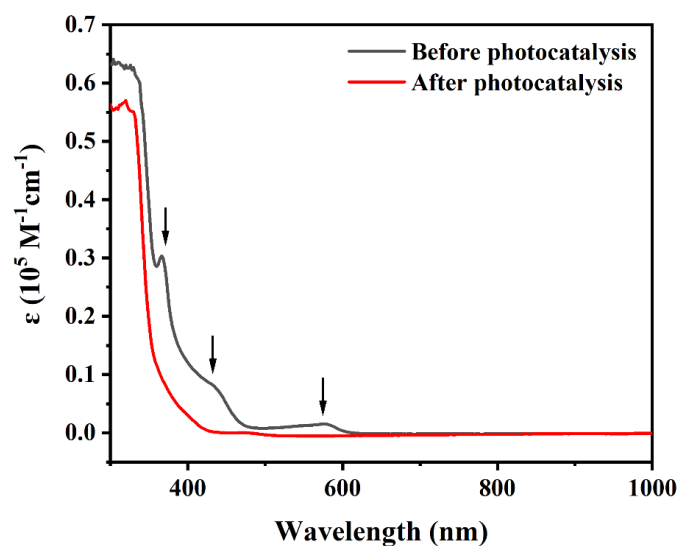

**Fig. S10** UV-vis absorption spectra of photocatalytic reaction solution using **Fe1** before and after photocatalysis.



**Table S1** Summary of photocatalysis experiments under different concentrations of **Fe1**, 4CzIPN, and different volume ratios of water.

| Entry | Fe1 ( $\mu\text{M}$ ) | 4CzIPN(mM) | Volume of water (mL) | CO                           |                    | H <sub>2</sub>               |     |
|-------|-----------------------|------------|----------------------|------------------------------|--------------------|------------------------------|-----|
|       |                       |            |                      | Products ( $\mu\text{mol}$ ) | TON (Selectivity%) | Products ( $\mu\text{mol}$ ) | TON |
| 1     | 0                     | 0.1        | 1                    | 0.49                         | 0                  | 0                            | 0   |
| 2     | 6                     | 0.1        | 1                    | 11.13                        | 371                | 0                            | 0   |
| 3     | 10                    | 0.1        | 1                    | 20.31                        | 406(95.5)          | 0.96                         | 19  |
| 4     | 20                    | 0.1        | 1                    | 31.05                        | 311(98.1)          | 0.61                         | 12  |
| 5     | 40                    | 0.1        | 1                    | 35.09                        | 175(97.8)          | 0.78                         | 16  |
| 6     | 10                    | 0          | 1                    | 0                            | 0                  | 0                            | 0   |
| 7     | 10                    | 0.01       | 1                    | 9.59                         | 192(96.6)          | 0.34                         | 7   |
| 8     | 10                    | 0.05       | 1                    | 20.31                        | 406                | 0                            | 0   |
| 9     | 10                    | 0.1        | 1                    | 29.03                        | 581(98.8)          | 0.35                         | 7   |
| 10    | 10                    | 0.2        | 1                    | 41.05                        | 821(99.4)          | 0.26                         | 5   |
| 11    | 10                    | 0.3        | 1                    | 43.60                        | 872(98.7)          | 0.57                         | 11  |
| 12    | 10                    | 0.4        | 1                    | 43.96                        | 879(99.4)          | 0.26                         | 5   |
| 13    | 10                    | 0.1        | 0                    | 8.05                         | 161                | 0                            | 0   |
| 14    | 10                    | 0.1        | 0.5                  | 19.34                        | 387(98.8)          | 0.23                         | 5   |
| 15    | 10                    | 0.1        | 1                    | 20.31                        | 406(95.5)          | 0.96                         | 19  |
| 16    | 10                    | 0.1        | 1.5                  | 14.31                        | 286(98.0)          | 0.29                         | 6   |
| 17    | 10                    | 0.1        | 2                    | 14.53                        | 291(99.5)          | 0.08                         | 2   |
| 18    | 10                    | 0.1        | 2.5                  | 15.08                        | 302(97.4)          | 0.41                         | 8   |
| 19    | 10                    | 0.1        | 3                    | 0                            | 0                  | 0                            | 0   |
| 20    | 10                    | 0.1        | 3.5                  | 0                            | 0                  | 0                            | 0   |

Conditions: use a visible light (3 W white LEDs,  $\lambda = 420\text{-}650\text{ nm}$ ) to irradiate the CO<sub>2</sub>-saturated reaction solution for 120 min at room temperature. TON =  $n(\text{product})/n(\text{Fe1})$ . **entry 1-5:** TONs of CO and H<sub>2</sub> with different concentrations of **Fe1** (0-40  $\mu\text{M}$ ) in 5 mL DMF/H<sub>2</sub>O (v/v = 4/1) solution containing 4CzIPN (0.1 mM), and TEA (0.28 M); **entry 6-12:** TONs of CO and H<sub>2</sub> with different concentrations of 4CzIPN (0-0.4 mM) in 5 mL DMF/H<sub>2</sub>O (v/v = 4/1) solution containing **Fe1** (10  $\mu\text{M}$ ), 4CzIPN and TEA (0.28 M); **entry 13-20:** TONs of CO and H<sub>2</sub> with different volumes of water in 5 mL DMF/H<sub>2</sub>O solutions containing **Fe1** (10  $\mu\text{M}$ ), 4CzIPN (0.3 mM), and TEA (0.28 M).

**Table S2** Time-dependent generation of CO in a 5 mL CO<sub>2</sub>-saturated DMF/H<sub>2</sub>O (v/v = 4/1) solution containing 10 μM **Fe1** (entry 1-5), **Fe2** (entry 6-10) or **Zn1** (entry 11-15), 0.28 M TEA, and 0.3 mM 4CzIPN.

| Entry | Cat        | Irradiation time (min) | CO              |                    | H <sub>2</sub>  |     |
|-------|------------|------------------------|-----------------|--------------------|-----------------|-----|
|       |            |                        | Products (μmol) | TON (Selectivity%) | Products (μmol) | TON |
| 1     | <b>Fe1</b> | 0                      | 0               | 0                  | 0               | 0   |
| 2     |            | 15                     | 20.48           | 410(99.8)          | 0.04            | 1   |
| 3     |            | 30                     | 35.64           | 713(99.1)          | 0.34            | 7   |
| 4     |            | 60                     | 39.03           | 781(98.1)          | 0.77            | 15  |
| 5     |            | 120                    | 43.91           | 878(99.2)          | 0.37            | 7   |
| 6     | <b>Fe2</b> | 0                      | 0               | 0                  | 0               | 0   |
| 7     |            | 15                     | 2.19            | 44(98.6)           | 0.03            | 1   |
| 8     |            | 30                     | 3.07            | 61(95.0)           | 0.16            | 3   |
| 9     |            | 60                     | 3.17            | 63(94.9)           | 0.17            | 3   |
| 10    |            | 120                    | 3.17            | 63(94.6)           | 0.18            | 4   |
| 11    | <b>Zn1</b> | 0                      | 0               | 0                  | 0               | 0   |
| 12    |            | 15                     | 0.83            | 17                 | 0               | 0   |
| 13    |            | 30                     | 1.05            | 21                 | 0               | 0   |
| 14    |            | 60                     | 1.33            | 27                 | 0               | 0   |
| 15    |            | 120                    | 2.630           | 53                 | 0               | 0   |

**Table S3** Comparison of CO<sub>2</sub> photoreduction with recent molecular complexes.

| Catalyst                                                | Photosensitizer                     | [Catalyst]/<br>[Photosensitizer] | TON(selectivity %) |                | Reaction conditions                                                                  | Reference                                                                 |
|---------------------------------------------------------|-------------------------------------|----------------------------------|--------------------|----------------|--------------------------------------------------------------------------------------|---------------------------------------------------------------------------|
|                                                         |                                     |                                  | CO                 | H <sub>2</sub> |                                                                                      |                                                                           |
| <b>Fe1</b>                                              | 4CzIPN                              | 10 μM / 0.3 mM                   | 878(99.2)          | 7(0.8)         | 0.28 M TEA in DMF/H <sub>2</sub> O (v/v = 4/1), white LEDs (3 W, λ = 420-650 nm), 2h | This work                                                                 |
| <b>Zn1</b>                                              | 4CzIPN                              | 10 μM / 0.3 mM                   | 53(~100 %)         | 0(0)           | 0.28 M TEA in DMF/H <sub>2</sub> O (v/v = 4/1), white LEDs (3 W, λ = 420-650 nm), 2h | This work                                                                 |
| Fe(qnpy)(H <sub>2</sub> O) <sub>2</sub> ] <sup>2+</sup> | Ru(phen) <sub>3</sub> <sup>2+</sup> | 50 μM / 0.2 mM                   | 14095(98)          | 360(2)         | 0.11 M BIH in MeCN/H <sub>2</sub> O (1:1, v/v), blue LED (460 nm), 68h               | <i>Chem. Commun.</i> , 2020, <b>56</b> , 6249-6252. <sup>3</sup>          |
| <b>CoZn</b>                                             | Ru-PS                               | 0.1 μM / 0.4 mM                  | 6680(98)           | 136(2)         | 0.3 M TEOA in H <sub>2</sub> O/MeCN (v/v = 1/4) LED light (450 nm), 10h              | <i>ACS Sustain. Chem. Eng.</i> , 2021, <b>9</b> , 9273-9281. <sup>4</sup> |
| Re-THEA                                                 | -                                   | 0.4 mM                           | 43(> 99)           | < 1            | 0.3 mL TEOA in DMF, 500 W long-arc Xenon lamp (λ ≥ 400 nm), 12h                      | <i>ChemSusChem</i> , 2020, <b>13</b> , 6284-6289. <sup>5</sup>            |
| <b>Ni-IDC</b>                                           | Ru(bpy) <sub>3</sub> <sup>2+</sup>  | 10 μM / 0.45 mM                  | 2264.8(95)         | 119.2(5)       | 0.029 mM BIH in DMF/TEOA (v/v = 5/1), LED blue light (460 nm), 12h                   | <i>Inorg. Chem. Commun.</i> , 2020, <b>122</b> , 108269. <sup>6</sup>     |
| Co(bpy) <sub>2</sub> Cl <sub>2</sub>                    | Acridine (Acr)                      | 2 μM / 0.4 mM                    | 100(~100 %)        | 0(0)           | 0.3 M TEOA in H <sub>2</sub> O/MeCN (v/v = 1/4), 300 W Xe lamp (λ ≥ 400 nm), 5h      | <i>Mol. Catal.</i> , 2021, <b>500</b> , 111299. <sup>7</sup>              |

**Notes and references**

1. J. Zhang, D. Campolo, F. Dumur, P. Xiao, J. P. Fouassier, D. Gigmes and J. Lalevée, *J. Appl. Polym. Sci.*, 2016, **54**, 2247-2253.
2. J. Luo and J. Zhang, *ACS Catal.*, 2020, **10**, 14302-14303.
3. Y. Qin, L. Chen, G. Chen, Z. Guo, L. Wang, H. Fan, M. Robert and T. C. Lau, *Chem. Commun.*, 2020, **56**, 6249-6252.

4. D. Liu, M. Zhang, H.-H. Huang, Q. Feng, C. Su, A. Mo, J.-W. Wang, Z. Qi, X. Zhang, L. Jiang and Z. Chen, *ACS Sustain. Chem. Eng.*, 2021, **9**, 9273-9281.
5. K. H. Chen, N. Wang, Z. W. Yang, S. M. Xia and L. N. He, *ChemSusChem*, 2020, **13**, 6284-6289.
6. Q.-Q. Xu, R. Liu, W.-H. Mu, R. Chen, B. Huang, Z. Yang and J.-F. Kou, *Inorg. Chem. Commun.*, 2020, **122**, 108269.
7. X. Chen, Y. Wei, W. Sun, X. Meng, S. Hao and Y. Gao, *Mol. Catal.*, 2021, **500**, 111299.
